- Study to understand prognoses and preferences for outcomes and risks of treatment. *JAMA* 1994; 272: 1839–44.
14. Brunton M, Jordan C, Fouche C. Managing public health care policy: who's being forgotten? *Healthy Policy* 2008; 88: 348–58.
  15. Ustun TB, Chatterji S, Mechbal A *et al.* The World Health Surveys. In: Murray C, Evans D, eds. *Health Systems Performance Assessment Debates, Methods and Empiricisms*. Geneva: World Health Organization, 2003; 797–808.
  16. Moussavi S, Chatterji S, Verdes E *et al.* Depression, chronic diseases, and decrements in health: results from the World Health Surveys. *Lancet* 2007; 370: 851–8.
  17. Royston P. Multiple imputation of missing values: update. *Stata J* 2005; 5: 188–201.
  18. World Health Organization. World Health Survey Instruments and Related Documents 2011. Available from: URL: <http://www.who.int/healthinfo/survey/instruments/en/index.html>.
  19. Hosseinpour AR, Mohammad K, Majdzadeh R *et al.* Socioeconomic inequality in infant mortality in Iran and across its provinces. *Bull World Health Organ* 2005; 83: 837–44.
  20. Ferguson B, Murray C, Tandon A *et al.* Estimating permanent income using asset and indicator variables. In: Murray CJ, Evans D, eds. *Health Systems Performance Assessment Debates, Methods and Empiricism*. Geneva: World Health Organization, 2003.
  21. Wilson M, Allen DD, Li JC. Improving measurement in health education and health behavior research using item response modeling: introducing item response modeling. *Health Educ Res* 2006; 21(Suppl.1): i4–18.
  22. Chatterji S, Kowal P, Mathers C *et al.* The health of aging populations in China and India. *Health Aff (Millwood)* 2008; 27: 1052–63.
  23. Ayuso-Mateos JL, Nuevo R, Verdes E *et al.* From depressive symptoms to depressive disorders: the relevance of thresholds. *Br J Psychiatry* 2010; 196: 365–71.
  24. Characteristics and health of caregivers and care recipients—North Carolina, 2005. *MMWR Morb Mortal Wkly Rep* 2007; 56: 529–32.
  25. Howard BH, Phillips CV, Matinhure N *et al.* Barriers and incentives to orphan care in a time of AIDS and economic crisis: a cross-sectional survey of caregivers in rural Zimbabwe. *BMC Public Health* 2006; 6: 27.
  26. Sugiura K, Ito M, Kutsumi M *et al.* Gender differences in spousal caregiving in Japan. *J Gerontol B Psychol Sci Soc Sci* 2009; 64: 147–56.
  27. Papastavrou E, Charalambous A, Tsangari H. Exploring the other side of cancer care: the informal caregiver. *Eur J Oncol Nurs* 2009; 13: 128–36.
  28. Butterworth P, Pymont C, Rodgers B *et al.* Factors that explain the poorer mental health of caregivers: results from a community survey of older Australians. *Aust N Z J Psychiatry* 2010; 44: 616–24.
  29. Keefe FJ, Ahles TA, Porter LS *et al.* The self-efficacy of family caregivers for helping cancer patients manage pain at end-of-life. *Pain* 2003; 103: 157–62.
  30. Reich S, Bickman L, Heflinger CA. Covariates of self-efficacy: caregiver characteristics related to mental health services self-efficacy. *J Emotion Behav Disord* 2004; 12: 99–108.
  31. Giovannetti ER, Wolff JL. Cross-survey differences in national estimates of numbers of caregivers of disabled older adults. *Milbank Q* 2010; 88: 310–49.

Received 10 April 2012; accepted in revised form 14 August 2012

*Age and Ageing* 2013; 42: 338–345

doi: 10.1093/ageing/afs166

Published electronically 25 November 2012

© The Author 2012. Published by Oxford University Press on behalf of the British Geriatrics Society.

All rights reserved. For Permissions, please email: [journals.permissions@oup.com](mailto:journals.permissions@oup.com)

# Cardiovascular risk factors and cognitive decline in adults aged 50 and over: a population-based cohort study

ALEX DREGAN<sup>1</sup>, ROBERT STEWART<sup>2</sup>, MARTIN C. GULLIFORD<sup>1</sup>

<sup>1</sup>NIHR Biomedical Research Centre at Guy's and St Thomas' NHS Foundation Trust and King's College London, 6th Floor, Capital House, 42 Weston Street, London, UK

<sup>2</sup>Institute of Psychiatry, Kings College London, London, UK

Address correspondence to: A. Dregan. Tel: (+44) 02078486639; Fax: (+44) 02078486620. Email: [alexandru.dregan@kcl.ac.uk](mailto:alexandru.dregan@kcl.ac.uk)

## Abstract

**Objectives:** the objective of the present study was to explore the association between cardiovascular risk and cognitive decline in adults aged 50 and over.

**Methods:** participants were older adults who participated in the English Longitudinal Study of Ageing. Outcome measures included standardised  $z$ -scores for global cognition, memory and executive functioning. Associations between cardiovascular risk factors and 10-year Framingham risk scores with cognitive outcomes at 4-year and 8-year follow-ups were estimated.

**Results:** the mean age of participants ( $n = 8,780$ ) at 2004–05 survey was 66.93 and 55% were females. Participants in the highest quartile of Framingham stroke risk score (FSR) had lower global cognition ( $b = -0.73$ , CI:  $-1.37, -0.10$ ), memory ( $b = -0.56$ , CI:  $-0.99, -0.12$ ) and executive ( $b = -0.37$ , CI:  $-0.74, -0.01$ ) scores at 4-year follow-up compared with those in the lower quartile. Systolic blood pressure  $\geq 160$  mmHg at 1998–2001 survey was associated with lower global cognitive ( $b = -1.26$ , CI:  $-2.52, -0.01$ ) and specific memory ( $b = -1.16$ , CI:  $-1.94, -0.37$ ) scores at 8-year follow-up. Smoking was consistently associated with lower performance on all three cognitive outcomes.

**Conclusion:** elevated cardiovascular risk may be associated with accelerated decline in cognitive functioning in the elderly. Future intervention studies may be better focused on overall risk rather than individual risk factor levels.

**Keywords:** cognition, vascular factors, risk score, prospective study, older people

## Introduction

Cognitive decline becomes more common with ageing and, for an increasing number of people, interferes with daily functioning and well being. Several cardiovascular (CVD) risk factors, including high blood pressure (BP), dyslipidaemia, smoking and obesity, have been proposed as important modifiable risk factors for cognitive decline [1, 2]. Longitudinal studies that explored the association of vascular risk factors with cognitive functioning produced contradictory or inconclusive findings reporting positive, negative and absent relationships between BP [1, 3–5], serum cholesterol [1, 6–8] and BMI [9, 10] with cognitive functioning. There is more consistent evidence that smokers tend to be at a greater risk of cognitive decline compared with non-smokers [11] although the risk might be limited to specific cognitive domains [9, 12]. Considering composite measures of risk, cross-sectional studies [13, 14] tend to report associations between higher Framingham stroke risk (FSR) scores and worse cognitive function, including a recent study of UK civil service employees by Kaffashian *et al.* [15]. However, no population-based longitudinal evidence is available to date on this exposure.

The aim of the analyses described here was to investigate the prospective associations of FSR and CVD risk scores (FCVDR), BP, cholesterol levels, smoking and BMI in relation to cognitive function in a nationally representative sample of adults. A particular objective was to explore the extent to which the association of vascular risk factors with cognitive decline varied as a function of the length of follow-up. The focus was on predictors with greatest opportunities for intervention: specifically, BP, cholesterol, smoking and BMI.

## Methods

The study employed data from the English Longitudinal Study of Ageing (ELSA) which is a prospective and nationally representative sample of people aged 50 and over residing in private households in England. To date there are five data collection surveys (1998–2001, 2002–03, 2004–05,

2006–07, 2008–09) and the present analyses drew primarily on 2004–05 data ( $n = 9,432$ ) which represent the first survey where both cognitive and physiological measurements, including systolic blood pressure (SBP), cholesterol levels and BMI, were collected. Out of the 8,780 core study members, 6,269 (71%) also contributed data to the 2008–09 follow-up (see Supplementary data available in *Age and Ageing* online, Appendix 1). Biomedical and physical performance measures were collected from respondents by a trained nurse on ~7,666 core members. Full details on response to the main interview and physiological measurements are provided in the Technical Report [16]. Data from the 1998–2001 survey ( $n = 11,205$ ) were also incorporated. About 6,981 (62%) have also participated in the 2008–09 follow-up study.

## Cognitive measures

### Memory

Each respondent was asked to learn 10 unrelated words, and immediate and delayed recall were tested (the delayed recall performed after the letter-cancellation and animal-naming tests). Immediate and delayed recall tests have been shown to have good construct validity and consistency [17]. For the prospective memory test, the respondents had to remind the interviewer to do two-specific tasks at the end of the test. A memory index was created by summing-up the  $z$ -scores on the individual memory tests.

### Executive functioning

A verbal fluency task involved the participants naming as many different animals as possible within 1 min. The reliability and validity of the animal-naming test is well documented [18]. A letter-cancellation test was used to measure attention, mental speed and visual scanning abilities with two-independent scores are calculated: speed and accuracy. An index of executive functioning was developed by summing-up the  $z$ -scores on animal naming, speed and accuracy tasks.

### **Cognitive index**

A continuous measure of overall cognitive functioning was provided by summing-up participants' z-scores on the memory and executive indexes. Each test receives equal weighting towards the combined cognitive index.

### **Vascular risk factors**

#### **Blood pressure**

BP measurements included SBP and DBP values assessed by the nurse at three surveys (1998–2001, 2004–05 and 2008–09) and were recorded on each occasion as the average of three measurements taken on the right arm with the informant in a seated position after 5 min rest. Finally, a categorical variable was created at both 1998–2001 and 2004–05 surveys that classified individuals into 'normal' (SBP <140 mmHg and DBP ≤90 mmHg), 'borderline-high' (SBP 140–160 mmHg and DBP >90–99 mmHg) and 'high' (SBP >160 mmHg and DBP ≥100 mmHg) [7].

#### **Cholesterol**

Measure of fasting serum cholesterol included total cholesterol levels. The continuous measure was developed in an identical fashion to that described for BP. The categorical variable aimed to classify respondents into what may be seen as clinically relevant categories. Thus, at both 1998–2001 and 2004–05 surveys according to their TC levels participants were classified as optimal (0–5.2 mmol/l), mildly high (5.2 to <6.2) and high (>6.2 mmol/l).

#### **BMI**

At each survey two BMI variables were developed following the BP and TC procedures. The categorical variable for BMI grouped participants into normal (18.5–25 kg/m<sup>2</sup>), overweight (25–29.9 kg/m<sup>2</sup>) and obese (≥30 kg/m<sup>2</sup>).

#### **Smoking**

Participants were classified in two groups: non-smokers (never smoked or ex-smokers) and smokers (current smokers).

#### **Cardiovascular risk profile**

The study also used the FSR and FCVDR risk scores using 2004–05 data. These risk scores were calculated using information on age, gender, systolic blood pressure, ratio of TC to HDL, diabetes and cigarette smoking and follow the equations reported by Anderson *et al.* [19]. Left ventricular hypertrophy was not included as this information is not collected in ELSA. Risk scores were divided into quartiles for analysis.

#### **Covariates**

Additional variables known to be associated with both cognitive functioning and vascular disease were selected. Aside

from age (continuous) and gender (binary), *highest educational qualification* grouped participants into: no qualification; level 1 National Vocational Qualification (NVQ1) or certificate of secondary education (CSE); NVQ2 or O-level; NVQ3 or A-level or higher qualification but below degree and degree-level or higher or NVQ 4/5. *Alcohol intake* was calculated from participant-reported drinking frequency over the previous year (weekly drinking versus occasional or never). Based on participant-reported frequency of physical activity a four category *physical exercise* variable was created: sedentary, low, moderate and high. An abbreviated Center for Epidemiological Studies Depression Scale (CES-D) [20] measure was used to create a continuous measure of *depressive symptoms* (scores ranged from 0 to 8). As 1998–2001 data did not incorporate CES-D, the General Health Questionnaire (GHQ-12) [21] was used as a measure of current mental health status (scores ranging from 0 to 12). Self-reported stroke and diabetes (present/absent) were also included as covariates. The final covariates included whether or not respondents were treated with antihypertensive or cholesterol-lowering drugs (yes/no).

### **Statistical analysis**

Descriptive statistics were estimated to determine the study sample characteristics. The primary analysis involved multi-variable regression analysis using 2004–05 data to estimate the association of SBP, DBP, TC, smoking and BMI values with overall and specific cognitive decline at 4-year follow-up (2008–09 survey) adjusting for baseline (2004–05) covariates. Cognitive adjustment at baseline involved including the corresponding measure as a covariate, for instance when estimating memory at the follow-up baseline memory score was used as a covariate. The association of high and border-range SBP, DBP, TC and BMI values at 2004–05 surveys compared with normal-range values on overall and specific cognitive measures at 2008–09 follow-up was also estimated using the same estimation models. Similar estimation models were employed to predict the association of the same vascular risk factors assessed at the 1998–2001 survey with cognitive performance at 8-year follow-up (Figure 1).

In addition, multivariable linear regression analyses were used to investigate the longitudinal association between 10-year FSR and FCVDR scores quartile at 2004–05 survey with cognitive decline at 4-year follow-up, adjusting for baseline (2004–05) data. Participants in the bottom quartile of stroke and CVD risk scores distribution were used as the reference category. These analyses excluded participants with a diagnosis of CVD (angina, myocardial infarction, congestive heart failure and heart murmur), stroke or dementia at or prior to 2004–05 survey. As the results for men and women were similar, for ease of presentation the overall results are presented. A level of 0.05 was chosen to indicate statistical significance. All analyses were carried out using STATA version 11. Analyses were weighted to adjust for non-response.

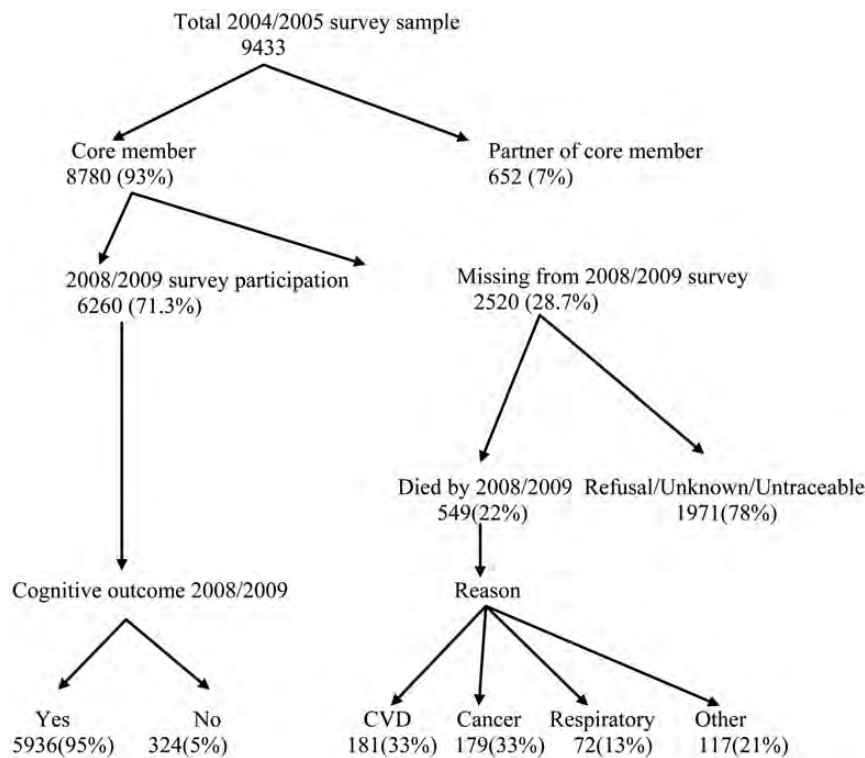

**Figure 1.** Diagram charting 2004–05 survey participants’ response patterns at 2008–09 survey.

## Results

Table 1 shows the characteristics of the 1998–2001 and 2004–05 study samples. The mean age of participants was 62.5 at the 1998–2001 survey compared with 66.93 at the 2004–05 survey with 55% being females in both surveys. There was a modest decline in mean SBP values from the 1998–2001 (141.5 mmHg) to the 2004–05 (136.4 mmHg) surveys. Total cholesterol mean values were similar at the two surveys (6.0 and 5.9 mmol/l, respectively) as were mean BMI values (27.6 versus 28.5 kg/m<sup>2</sup>). There was limited change in the mean scores on all cognitive outcome measures over time among participants taking part in both 2004–05 and 2008–09 data. For response patterns, see Supplementary data available in *Age and Ageing* online, Appendix 1. Table 2 shows the relationship between FSR and FCVDR quartile at 2004–05 survey with cognitive decline at 4-year follow-up. The results indicate that compared with participants in the lower quartile of FSR those in the upper quartile of FSR showed significantly lower overall cognitive ( $b = -0.73$ ,  $P < 0.05$ ), specific memory ( $b = -0.56$ ,  $P < 0.05$ ) and executive ( $b = -0.37$ ,  $P < 0.05$ ) scores at 4-year follow-up, even after adjusting for 2004–05 cognitive scores. Participants in the third quartile of FSR also presented lower overall cognitive ( $b = -0.61$ ,  $P < 0.05$ ) and specific memory ( $b = -0.50$ ,  $P < 0.05$ ) scores compared with those in the lower quartile. FCVDR score estimates were in the same direction and of similar size to the FSR scores.

The longitudinal associations between vascular risk factors and all three cognitive measures are shown in Table 3. To test the hypothesis for a duration–response

effect with respect to the relationship between BP and cognitive decline, Table 3 includes the results based on 1998–2001 BP data (first column). The results revealed that smoking represents the most consistent vascular risk predictor of cognitive decline across all three cognitive outcomes in both models. High BMI was also associated with lower scores ( $b = -0.02$ ,  $P < 0.05$ ) on memory as was borderline high SBP levels ( $b = -0.24$ ,  $P < 0.05$ ). With respect to the 1998–2001 estimation model, the results revealed that both high DBP and SBP were associated with lower global cognitive and memory scores at 8-year follow-up. However, when BP was used as a categorical predictor the results indicating that SBP over 160 mmHg was negatively associated with lower overall cognitive ( $b = -1.26$ ,  $P < 0.05$ ) and memory ( $b = -1.16$ ,  $P < 0.05$ ) scores at 8-year follow-up.

## Discussion

The present study investigated vascular risk factors for cognitive impairment in this informative longitudinal cohort. In a large prospective data, the study found that 10-year FSR and FSCVD were significantly associated with cognitive decline on both global and specific (memory and executive) measures at 4-year follow-up.

An important outcome of the present study was the consistent association observed between smoking and low global cognitive and specific memory and executive scores at 4-year and 8-year follow-ups. With respect to the association of BP with cognitive functioning, the findings imply that both age and probably duration of high BP levels are



Table 1. Characteristics of participants at 1998–2001 and 2004–05 surveys

|                                       | 1998–2000 |              | 2004–05 |              |
|---------------------------------------|-----------|--------------|---------|--------------|
|                                       | Freq.     | Mean or %    | Freq.   | Mean or %    |
| Age (years)                           | 11,205    | 62.5         | 8,780   | 66.9 (10.1)  |
| Sex                                   |           |              |         |              |
| Female                                | 6,148     | 55           | 4,830   | 55           |
| Male                                  | 5,057     | 45           | 3,950   | 45           |
| Smoker (current versus never or past) |           |              |         |              |
| No                                    | 9,032     | 81           | 7,424   | 85           |
| Yes                                   | 2,170     | 19           | 1,329   | 15           |
| Alcohol intake                        |           |              |         |              |
| Never or occasionally                 | 7,392     | 66           | 4,903   | 65           |
| Weekly                                | 3,792     | 34           | 2,696   | 35           |
| BMI (continuous)                      | 10,121    | 27.6 (4.6)   | 7,225   | 28.6 (5.2)   |
| Qualifications                        |           |              |         |              |
| No education—reference group          | 4,951     | 44           | 3,418   | 39           |
| NVQ1/CSE/Other                        | 1,455     | 13           | 1,197   | 14           |
| NVQ2/GCE O level                      | 1,754     | 16           | 1,465   | 17           |
| NVQ3/A level/below degree             | 1,839     | 16           | 1,622   | 18           |
| NVQ4/NVQ5/degree+                     | 1,206     | 11           | 1,069   | 12           |
| Physical exercise                     |           |              |         |              |
| Low or sedentary                      | 2,175     | 32           | 2,738   | 31           |
| Moderate                              | 3,188     | 46           | 4,356   | 50           |
| Vigorous                              | 1,521     | 22           | 1,588   | 19           |
| Systolic blood pressure (continuous)  | 8,465     | 141.5 (19.6) | 7,563   | 136.4 (19.1) |
| Diastolic blood pressure (continuous) | 8,465     | 77.4 (12.1)  | 7,563   | 75.5 (11.2)  |
| Total cholesterol (continuous)        | 3,867     | 6.0 (1.1)    | 5,904   | 5.9 (1.2)    |
| HDL cholesterol (continuous)          | 4,026     | 1.5 (0.4)    | 5,899   | 1.5 (0.4)    |
| LDL cholesterol (continuous)          | 169       | 3.7 (1.0)    | 5,742   | 3.6 (1.0)    |
| Depression (continuous)               | 10,722    | 1.3 (2.5)    | 8,686   | 1.5 (2.0)    |
| Blood pressure-lowering drugs         |           |              |         |              |
| No                                    | 5,171     | 66           | 7,467   | 85           |
| Yes                                   | 2,621     | 34           | 1,313   | 15           |
| Cholesterol-lowering drugs            |           |              |         |              |
| No                                    | 8,132     | 94           | 8,537   | 97           |
| Yes                                   | 556       | 6            | 243     | 3            |
| Stroke—doctor diagnosed               |           |              |         |              |
| No                                    | 11,047    | 99           | 8,314   | 95           |
| Yes                                   | 158       | 1            | 466     | 5            |
| Diabetes—doctor diagnosed             |           |              |         |              |
| No                                    | 10,692    | 91           | 8,000   | 91           |
| Yes                                   | 513       | 5            | 780     | 9            |
| Cognitive functioning index           | NA        | NA           | 8,370   | 28.5 (6.7)   |
| Memory index                          | NA        | NA           | 8,630   | 15.4 (4.5)   |
| Executive functioning index           | NA        | NA           | 8,372   | 13.0 (3.4)   |
| 2008–2009 survey—cognitive outcomes   |           |              |         |              |
| Cognitive functioning index           |           |              | 5,350   | 28.6 (6.3)   |
| Memory index                          |           |              | 5,913   | 15.2 (3.9)   |
| Executive functioning index           |           |              | 5,355   | 13.3 (3.4)   |

For categorical variables mean refers to the proportion of respondents. Missing cases are excluded.

in the long-term detrimental to cognitive performance. For instance, participants in the 1998–2001 survey were on average 5 years younger than those in the 2004–05 suggesting that age, duration or both might be associated with declined cognitive performance. The possibility of a cumulative effect also seems probable whereby participants with high SBP (>160 mmHg) values were at a greater risk of lower cognitive scores 8 years later compared with those with normal SBP values (<140 mmHg). Of note is the finding that participants with borderline high SBP levels at 2004–05 were at risk of lower memory scores 4 years later. It may be that individuals with borderline high SBP levels

were not prescribed antihypertensive treatment drugs which then results in an increased risk of cognitive decline over the short term. This suggestion needs confirmation from future research. Overall, the study findings indicate that high BP may be detrimental to cognitive functioning and that this impact is likely to develop over a longer period of time, future clinical trials might benefit from this insight.

A domain-specific association of vascular risk factors seems also probable. Particularly, the detrimental association of BP appeared to be restricted to memory functioning. Alternatively, a longer exposure to high BP may be needed for a significant decline in executive performance to

**Table 2.** Longitudinal association between 2004 and 2005 Framingham stroke risk (FSR) score with cognitive outcomes at 4-year follow-up

|                               | Cognitive index <i>b</i> (95% CI) | Memory index <i>b</i> (95% CI) | Executive index <i>b</i> (95% CI) |
|-------------------------------|-----------------------------------|--------------------------------|-----------------------------------|
| FSR score quartiles (range)   |                                   |                                |                                   |
| Lower quartile (0.005–0.038)  | Reference                         | Reference                      | Reference                         |
| Second quartile (0.039–0.063) | 0.06 (–0.34, 0.47)                | –0.02 (–0.30, 0.27)            | –0.03 (–0.27, –0.22)              |
| Third quartile (0.064–0.106)  | <b>–0.61 (–1.10, –0.12)</b>       | <b>–0.50 (–0.84, –0.16)</b>    | –0.23 (–0.52, 0.06)               |
| Upper quartile (0.107–0.567)  | <b>–0.73 (–1.37, –0.10)</b>       | <b>–0.56 (–0.99, –0.12)</b>    | <b>–0.37 (–0.74, –0.01)</b>       |
| FSCVD score quartiles (range) |                                   |                                |                                   |
| Lower quartile (0.005–0.038)  | Reference                         | Reference                      | Reference                         |
| Second quartile (0.039–0.063) | 0.41 (–0.84, 0.02)                | –0.23 (–0.52, 0.07)            | –0.21 (–0.47, –0.06)              |
| Third quartile (0.064–0.106)  | <b>–0.72 (–1.234, –0.20)</b>      | <b>–0.59 (–0.94, –0.24)</b>    | –0.23 (–0.54, 0.07)               |
| Upper quartile (0.107–0.567)  | <b>–0.92 (–1.53, –0.31)</b>       | <b>–0.56 (–0.99, –0.13)</b>    | <b>–0.45 (–0.80, –0.08)</b>       |

The analyses also adjusted for gender, age, alcohol, physical activity level, educational qualifications, depression and cognitive functioning at 2004–05 survey. Bold figures indicate statistical significance at 0.05 level. Participants with past or present CVD at 2004–05 survey, stroke or dementia disease have been excluded from the estimation models.

be observed. These suggestions are compatible with a *domino* effect whereby preliminary memory impairment as a result of high BP is later translated in impaired executive functioning performance. It is equally plausible to suggest that executive functioning decline over the short term presents a higher threshold that entails the combined association of multiple vascular risk factors.

The latter suggestion appears to be supported by the negative longitudinal association between FSR and FCVDR with all three cognitive outcome measures at 4-year follow-up. In particular, participants in the upper quartile of the stroke and CVD risk scores are at a greater risk of global cognitive as well as specific memory and executive decline relative to their counterparts in the lower quartile. These findings substantiate the claim that the combined effects of particular vascular risk factors may expedite the process of cognitive decline. It would appear that the most promising preventative approach would be one that considers the multicausality nature of cognitive decline. Specifically, interventions to limit cognitive decline should consider the combined effect of multiple vascular risk factors rather than focusing on the management of individual-risk factors as routinely performed in the past.

Present findings corroborate with earlier evidence that the negative association of BP with cognitive functioning represents a gradual process that takes place over long periods of time [4, 22, 23]. The limited evidence of an association between BP and cognitive decline at 4 year may explain the lack of significant effect of short-term antihypertensive clinical trials with cognitive decline [24–26]. A detrimental association of smoking with cognitive functioning at midlife has been reported previously [27] and the present extend these findings to older people within a population-based cohort data. Finally, the study findings extend previous cross-sectional [13] studies and confirm longitudinal evidence [14] for a negative association between FSR and FCVDR risk scores with cognitive impairment in adults.

The present data have many strengths including the use of both individual and combined vascular risk factors,

different follow-up periods, the ability to adjust for prior cognitive functioning (important limitation of previous studies), the longitudinal design and its representativeness. Several limitations are also important to mention. The present data did not collect information on cognitive functioning at 1998–2001 survey which impeded our ability to tests similar models. However, the 1998–2001 estimation model included an educational qualifications measure, a commonly employed proxy measure for cognitive functioning. Further, present data include only two surveys with both cognitive functioning and physiological measures of vascular risk factors which limited our ability to model the relation between vascular risk factors and cognitive functioning over time. This issue remains to be tested.

The present study adds new knowledge by documenting a longitudinal association between FRS and CVD risk scores with both global and specific cognitive decline. Regarding particular vascular risk factors, smoking emerged as the most consistent predictor of cognitive decline. The relationship between BP with cognitive functioning appears to be time-dependent supporting a possible duration–response effect. These findings could serve as basis on which to develop future clinical trials aimed at preventing atypical cognitive decline in adults aged 50 and over and for designing population-level interventions.

## Key points

- Population-based evidence on the influence of multiple vascular risk factors on cognitive decline in elderly is scarce and inconclusive.
- The combined effects of particular vascular risk factors may expedite the process of cognitive decline.
- Smoking and long-term BP appear to increase the risk of cognitive decline in elderly.
- At the population level, the most promising preventative approach would be one that considers the multicausality nature of cognitive decline.

**Table 3.** Unstandardised coefficients (*b*) and confidence intervals (95% CI) for 1998–2001 and 2004–05 vascular risk predictors of cognitive outcomes at 2008–09 follow-up

|                                    | Cognitive index <i>b</i> (95%CI) |                             | Memory index <i>b</i> (95%CI) |                             | Executive index <i>b</i> (95%CI) |                             |
|------------------------------------|----------------------------------|-----------------------------|-------------------------------|-----------------------------|----------------------------------|-----------------------------|
|                                    | 1998–2001                        | 2004–05                     | 1998–2001                     | 2004–05                     | 1998–2001                        | 2004–05                     |
| .....                              |                                  |                             |                               |                             |                                  |                             |
| Continuous predictors model        |                                  |                             |                               |                             |                                  |                             |
| SBP (mmHg)                         | <b>−0.22 (−0.43, −0.01)</b>      | −0.04 (−0.15, 0.07)         | <b>−0.16 (−0.29, −0.03)</b>   | −0.04 (−0.12, 0.04)         | −0.06 (−0.18, 0.06)              | −0.01 (−0.07, 0.06)         |
| DBP (mmHg)                         | <b>−0.31 (−0.59, −0.03)</b>      | −0.05 (−0.23, 0.13)         | <b>−0.20 (−0.38, −0.02)</b>   | 0.00 (−0.14, 0.09)          | −0.10 (−0.26, 0.06)              | −0.05 (−0.16, 0.05)         |
| TC (mmol/l)                        | 0.05 (−0.20, 0.29)               | −0.04 (−0.21, 0.12)         | −0.06 (−0.21, 0.10)           | −0.02 (−0.14, 0.10)         | 0.13 (−0.01, 0.27)               | −0.02 (−0.11, 0.08)         |
| BMI (kg/m <sup>2</sup> )           | 0.01 (−0.06, 0.07)               | −0.01 (−0.05, 0.04)         | −0.01 (−0.04, 0.04)           | <b>−0.02 (−0.05, −0.01)</b> | 0.01 (−0.02, 0.05)               | 0.01 (−0.01, 0.04)          |
| Categorical predictors model       |                                  |                             |                               |                             |                                  |                             |
| SBP (mmHg), Ref: <140              |                                  |                             |                               |                             |                                  |                             |
| 140 to <160                        | 0.07 (−1.00, 1.15)               | −0.31 (−0.64, 0.03)         | −0.14 (−0.80, 0.51)           | <b>−0.24 (−0.46, −0.01)</b> | 0.27 (−0.33, 0.87)               | −0.05 (−0.26, 0.16)         |
| ≥160                               | <b>−1.26 (−2.52, −0.01)</b>      | −0.12 (−0.63, 0.38)         | <b>−1.16 (−1.94, −0.37)</b>   | −0.07 (−0.42, 0.28)         | −0.27 (−0.96, 0.42)              | −0.04 (−0.34, 0.26)         |
| DBP (mmHg), Ref: <80               |                                  |                             |                               |                             |                                  |                             |
| 80 to <90                          | −0.01 (−0.67, 0.67)              | −0.13 (−0.45, 0.20)         | −0.08 (−0.49, 0.34)           | −0.03 (−0.25, 0.19)         | 0.11 (−0.39, 0.61)               | −0.09 (−0.29, 0.11)         |
| ≥90                                | −0.60 (−1.51, 0.31)              | 0.09 (−0.41, 0.58)          | −0.45 (−1.03, 0.16)           | 0.20 (−0.15, 0.54)          | −0.24 (−0.93, 0.45)              | −0.07 (−0.36, 0.22)         |
| TC (mmol/l), Ref: <5.2             |                                  |                             |                               |                             |                                  |                             |
| 5.2–6.2                            | −0.30 (−0.97, 0.37)              | 0.22 (−0.17, 0.62)          | −0.26 (−0.67, 0.15)           | 0.06 (−0.20, 0.33)          | −0.13 (−0.52, 0.26)              | 0.18 (−0.06, 0.42)          |
| ≥6.2                               | 0.08 (−0.56, 0.73)               | −0.02 (−0.40, 0.36)         | −0.21 (−0.61, 0.20)           | −0.05 (−0.30, 0.20)         | 0.33 (−0.04, 0.71)               | 0.02 (−0.21, 0.26)          |
| BMI (kg/m <sup>2</sup> ), Ref: <25 |                                  |                             |                               |                             |                                  |                             |
| Overweight (25–29.99)              | −0.25 (−0.89, 0.38)              | −0.02 (−0.37, 0.32)         | −0.29 (−0.68, 0.11)           | −0.05 (−0.28, 0.19)         | 0.03 (−0.34, 0.39)               | 0.02 (−0.23, 0.18)          |
| Obese (≥30)                        | −0.01 (−0.79, 0.77)              | 0.04 (−0.40, 0.36)          | −0.12 (−0.60, 0.37)           | −0.12 (−0.40, 0.16)         | 0.15 (−0.29, 0.59)               | 0.06 (−0.17, 0.28)          |
| Current smoker (yes/no)            | <b>−1.51 (−2.29, −0.74)</b>      | <b>−0.44 (−0.88, −0.01)</b> | <b>−0.70 (−1.19, −0.21)</b>   | −0.23 (−0.52, 0.07)         | <b>−0.87 (−1.31, −0.43)</b>      | <b>−0.29 (−0.55, −0.03)</b> |

Bold figures indicate statistical significance at 0.05 level. The estimation models also adjusted for gender, age, alcohol, educational qualifications, depression, stroke, diabetes, BP and cholesterol-lowering drugs and cognitive functioning. SBP, systolic blood pressure; DBP, diastolic blood pressure; TC, total cholesterol; BMI, body mass index; CI, confidence interval.

## Acknowledgment

This research was supported by the National Institute for Health Research (NIHR) Biomedical Research Centre at Guy's and St Thomas' NHS Foundation Trust and King's College London. The views expressed are those of the author(s) and not necessarily those of the NHS, the NIHR or the Department of Health.

## Conflicts of interest

None declared.

## Supplementary data

Supplementary data mentioned in the text is available to subscribers in *Age and Ageing* online.

## References

- Arntzen KA, Schirmer H, Wilsgaard T *et al.* Impact of cardiovascular risk factors on cognitive function: the Tromsø study. *Eur J Neurol* 2011; 18: 737–43.
- Stephan MC, Brayne C. Vascular factors and prevention of dementia. *Int R Psychiat* 2008; 20: 344–56.
- Glynn RJ, Beckett LA, Herbert LE *et al.* Current and remote blood pressure and cognitive decline. *JAMA* 1999; 281: 438–45.
- Kilander L, Nyman H, Boberg M *et al.* Hypertension is related to cognitive impairment: a 20-year follow-up of 999 men. *Hypertension* 1998; 31: 780–6.
- Kivipelto M, Helkala EL, Hanninen T *et al.* Midlife vascular risk factors and late-life mild cognitive impairment: a population study. *Neurology* 2001; 56: 1683–9.
- Solomon A, Kåreholt I, Ngandu T *et al.* Serum cholesterol changes after midlife and late-life cognition: twenty-one-year follow-up study. *Neurology* 2007; 68: 751–6.
- van den Kommer TN, Dik MG, Comijs HC *et al.* Total cholesterol and oxysterols: early markers for cognitive decline in elderly? *Neurobiol Aging* 2009; 30: 534–45.
- Yaffe K, Barrett-Connor E, Lin F *et al.* Serum lipoprotein levels, statin use, and cognitive functioning in older women. *Arch Neurol* 2002; 59: 378–84.
- Debette S, Seshadri S, Beiser A *et al.* Midlife vascular risk factor exposure accelerates structural brain aging and cognitive decline. *Neurology* 2011; 77: 461–8.
- Fitzpatrick AL, Kuller LH, Lopez OL *et al.* Midlife and late-life obesity and the risk of dementia: cardiovascular health study. *Arch Neurol* 2009; 66: 336–42.
- Anstey KJ, von Sanden C, Salim A *et al.* Smoking as a risk factor for dementia and cognitive decline: a meta-analysis of prospective studies. *Am J Epidemiol* 2007; 166: 367–78.
- Sabia S, Marmot M, Dufouil C *et al.* Smoking history and cognitive function in middle age from the Whitehall II study. *Arch Intern Med* 2008; 168: 1165–73.
- Llewellyn D, Lang IA, Xie J *et al.* Framingham stroke risk profile and poor cognitive functioning: a population-based study. *BMC Neurol* 2008; 8–12.
- Seshadri S, Wolf PA, Beiser A *et al.* Stroke risk profile, brain volume, and cognitive function. The Framingham Offspring Study. *Neurology* 2004; 63: 1591–9.
- Kaffashian S, Dugravot A, Nabi H *et al.* Predictive utility of the Framingham general cardiovascular risk profile for cognitive function: evidence from the Whitehall II study. *Eur Heart J* 2011; 32: 2326–32.
- Scholes S, Taylor R, Cheshire H *et al.* Technical Report (wave 2): Retirement, Health and Relationships of the Older Population in England: the 2004 English Longitudinal Study of Ageing. London: National Centre for Social Research, 2008.
- Baars MA, van Boxtel MP, Dijkstra JB *et al.* Predictive value of mild cognitive impairment for dementia: the influence of case definition and age. *Dement Geriatr Cogn Disord* 2009; 27: 173–81.
- Herzog AR, Wallace RB. Measures of cognitive functioning in the AHEAD Study. *J Gerontol B Psychol Sci Soc Sci* 1997; 52 (special issue): 37–48.
- Anderson KM, Odell PM, Wilson PWF *et al.* Cardiovascular disease risk profiles. *Am Heart J* 1991; 293–8.
- Radloff LS. The CES-D scale: a self-report depression scale for research in the general population. *App Psychol Meas* 1977; 1: 385–401.
- Goldberg DP. Manual of the General Health Questionnaire. Slough, England: National Foundation for Education Research, 1978.
- Elias PK, Elias MF, Robbins MA *et al.* Blood pressure-related cognitive decline: does age make a difference? *Hypertension* 2004; 44: 631–6.
- Haan M, Shemanski L, Jagust WJ *et al.* The role of APOE 4 in modulating effects of other risk factors for cognitive decline in elderly persons. *JAMA* 1999; 282: 40–6.
- Applegate WB, Pressel S, Wittes J *et al.* Impact of the treatment of isolated systolic hypertension on behavioral variables. Results from the Systolic Hypertension in the Elderly Program. *Arch Intern Med* 1994; 154: 2154–60.
- Lithell H, Hansson L, Skoog I *et al.* The Study on Cognition and Prognosis in the Elderly (SCOPE): principal results of a randomized double-blind intervention trial. *J Hypertens* 2003; 21: 875–86.
- Prince MJ, Bird AS, Blizard RA *et al.* Is the cognitive function of older patients affected by antihypertensive treatment? Results from 54 months of the Medical Research Council's treatment trial of hypertension in older adults. *BMJ* 1996; 312: 801–5.
- Richards M, Jarvis MJ, Thompson N, Wadsworth MJE. Cigarette smoking and cognitive decline in midlife: evidence from a perspective birth cohort study. *Am J Pub Health* 2003; 9: 994–8.

Received 10 April 2012; accepted in revised form 14 August 2012
